# Supplementary material for: Factors Associated with Risk of Diabetic Complications in Novel Cluster-Based Diabetes Subgroups: A Japanese Retrospective Cohort Study
Source: PubMed Central journal article supplement (PMC7408659; doi:10.3390/jcm9072083), 2020-07-02
Supplement: jcm-09-02083-s001.pdf [file jcm-09-02083-s001.pdf]

## Supplementary Materials

**Table S1.** Multiple comparison of baseline characteristics between five subgroups.

|                                     | Over<br>all | SAID vs<br>SIDD | SAID vs<br>SIRD | SAID vs<br>MOD | SAID vs<br>MARD | SIDD vs<br>SIRD | SIDD vs<br>MOD | SIDD vs<br>MARD | SIRD vs<br>MOD | SIRD vs<br>MARD | MOD vs<br>MARD |
|-------------------------------------|-------------|-----------------|-----------------|----------------|-----------------|-----------------|----------------|-----------------|----------------|-----------------|----------------|
| Sex (Male), %                       | 0.008       | 0.999           | 0.999           | 0.999          | 0.690           | 0.999           | 0.350          | 0.999           | 0.999          | 0.690           | 0.013          |
| Age, years                          | <0.00<br>1  | 0.176           | 0.974           | 0.117          | <0.001          | 0.452           | 0.999          | <0.001          | 0.402          | <0.001          | <0.001         |
| Age at diagnosis, years             | <0.00<br>1  | 0.117           | 0.646           | 0.003          | <0.001          | 0.831           | 0.235          | <0.001          | 0.119          | <0.001          | 0.006          |
| Diabetes duration, years            | 0.005       | 0.981           | 0.358           | 0.041          | 0.738           | 0.548           | 0.015          | 0.884           | 0.965          | 0.866           | 0.062          |
| BMI, kg/m <sup>2</sup>              | <0.00<br>1  | 0.415           | <0.001          | 0.003          | 0.942           | <0.001          | 0.004          | 0.181           | <0.001         | <0.001          | <0.001         |
| Systolic blood pressure,<br>mmHg    | 0.630       | 0.999           | 0.879           | 0.999          | 0.999           | 0.536           | 0.964          | 0.956           | 0.774          | 0.671           | 0.999          |
| Diastolic blood pressure,<br>mmHg   | 0.066       | 0.257           | 0.996           | 0.665          | 0.201           | 0.348           | 0.836          | 0.999           | 0.813          | 0.253           | 0.620          |
| Smoking, %                          | 0.046       | 0.999           | 0.999           | 0.999          | 0.999           | 0.999           | 0.999          | 0.073           | 0.999          | 0.999           | 0.184          |
| Family history of<br>diabetes, %    | 0.090       | 0.999           | 0.999           | 0.999          | 0.999           | 0.999           | 0.310          | 0.110           | 0.999          | 0.999           | 0.999          |
| Plasma glucose, mg/dL               | <0.00<br>1  | 0.016           | 0.009           | <0.001         | <0.001          | <0.001          | <0.001         | <0.001          | 0.999          | 0.985           | 0.931          |
| HbA1c, %                            | <0.00<br>1  | <0.001          | 0.047           | <0.001         | <0.001          | <0.001          | <0.001         | <0.001          | 0.211          | 0.027           | 0.884          |
| HbA1c, mmol/mol                     | <0.00<br>1  | <0.001          | 0.047           | <0.001         | <0.001          | <0.001          | <0.001         | <0.001          | 0.207          | 0.026           | 0.883          |
| HbA1c at the follow-<br>up, %       | <0.00<br>1  | 0.682           | <0.001          | <0.001         | <0.001          | <0.001          | <0.001         | <0.001          | 0.999          | 0.073           | <0.001         |
| HbA1c at the follow-up,<br>mmol/mol | <0.00<br>1  | 0.682           | <0.001          | <0.001         | <0.001          | <0.001          | <0.001         | <0.001          | 0.999          | 0.073           | <0.001         |
| HOMA2-B                             | <0.00<br>1  | 0.989           | <0.001          | <0.001         | 0.191           | <0.001          | <0.001         | <0.001          | <0.001         | <0.001          | <0.001         |

|                                  |        |        |        |        |        |        |        |        |        |        |        |
|----------------------------------|--------|--------|--------|--------|--------|--------|--------|--------|--------|--------|--------|
| HOMA2-IR                         | <0.001 | 0.720  | <0.001 | <0.001 | 0.999  | <0.001 | <0.001 | 0.082  | <0.001 | <0.001 | <0.001 |
| eGFR, mL/min/1.73 m <sup>2</sup> | <0.001 | 0.990  | 0.028  | 0.084  | 0.075  | <0.001 | <0.001 | <0.001 | 0.424  | 0.385  | 0.999  |
| Triglycerides, mg/dL             | <0.001 | 0.155  | 0.003  | <0.001 | 0.624  | 0.089  | 0.085  | 0.347  | 0.844  | 0.001  | <0.001 |
| LDL cholesterol, mg/dL           | 0.422  | 0.507  | 0.463  | 0.628  | 0.795  | 0.998  | 0.985  | 0.822  | 0.962  | 0.850  | 0.980  |
| Hypertension, %                  | 0.008  | 0.630  | 0.040  | 0.180  | 0.140  | 0.140  | 0.520  | 0.380  | 0.620  | 0.620  | 0.970  |
| Dyslipidemia, %                  | <0.001 | 0.349  | 0.002  | 0.015  | 0.349  | 0.042  | 0.349  | 0.941  | 0.349  | 0.024  | 0.107  |
| Chronic kidney disease, %        | 0.001  | 0.999  | 0.062  | 0.999  | 0.999  | <0.001 | 0.333  | 0.152  | 0.047  | 0.047  | 0.999  |
| Proteinuria, %                   | 0.093  | 0.999  | 0.999  | 0.999  | 0.999  | 0.999  | 0.999  | 0.999  | 0.999  | 0.330  | 0.410  |
| NAFLD, %                         | <0.001 | 0.034  | <0.001 | <0.001 | 0.276  | 0.143  | 0.096  | 0.09   | 0.644  | <0.001 | <0.001 |
| Polyneuropathy, %                | <0.001 | 0.999  | 0.706  | 0.173  | 0.005  | 0.765  | 0.107  | <0.001 | 0.999  | 0.765  | 0.541  |
| Retinopathy, %                   | <0.001 | 0.999  | 0.181  | 0.079  | 0.002  | 0.089  | 0.003  | <0.001 | 0.999  | 0.999  | 0.621  |
| Coronary artery disease, %       | 0.038  | 0.999  | 0.999  | 0.999  | 0.999  | 0.999  | 0.250  | 0.999  | 0.420  | 0.999  | 0.420  |
| Stroke, %                        | 0.824  | 0.999  | 0.999  | 0.999  | 0.999  | 0.999  | 0.999  | 0.999  | 0.999  | 0.999  | 0.999  |
| Peripheral artery disease, %     | 0.461  | 0.999  | 0.999  | 0.999  | 0.999  | 0.999  | 0.999  | 0.999  | 0.999  | 0.999  | 0.999  |
| Metformin, %                     | 0.005  | 0.025  | 0.689  | 0.689  | 0.174  | 0.689  | 0.046  | 0.689  | 0.999  | 0.999  | 0.689  |
| Insulin therapy, %               | <0.001 | <0.001 | <0.001 | <0.001 | <0.001 | 0.675  | <0.001 | 0.077  | 0.006  | 0.816  | <0.001 |

Overall P values were obtained by Kruskal-Wallis test and Chi-square test between five subgroups. P values by Holm test for a pair of five subgroups were shown. BMI: body mass index; HOMA2-B: homeostatic model assessment 2 estimates of  $\beta$ -cell function; HOMA2-IR: homeostatic model assessment 2 estimates of insulin resistance; HbA1c: Hemoglobin A1c; eGFR: estimated glomerular filtration rate; LDL: low density lipoprotein; NAFLD: nonalcoholic fatty liver disease.

**Table S2.** Multiple log-rank test for a pair of five subgroups in Kaplan-Meier survival analysis (Figure 2).

|                          | Over<br>all | SAID vs<br>SIDD | SAID vs<br>SIRD | SAID vs<br>MOD | SAID vs<br>MARD | SIDD vs<br>SIRD | SIDD vs<br>MOD | SIDD vs<br>MARD | SIRD vs<br>MOD | SIRD vs<br>MARD | MOD vs<br>MARD |
|--------------------------|-------------|-----------------|-----------------|----------------|-----------------|-----------------|----------------|-----------------|----------------|-----------------|----------------|
| Diabetic kidney disease  | 0.025       | 0.865           | 0.080           | 0.575          | 0.981           | 0.019           | 0.142          | 0.680           | 0.142          | 0.032           | 0.246          |
| Chronic kidney disease   | 0.094       | 0.820           | 0.330           | 0.660          | 0.820           | 0.170           | 0.210          | 0.820           | 0.510          | 0.170           | 0.210          |
| Proteinuria              | 0.005       | 0.528           | 0.018           | 0.381          | 0.699           | 0.018           | 0.668          | 0.528           | 0.036          | 0.003           | 0.241          |
| End-stage kidney disease | 0.092       | 0.730           | 0.730           | 0.910          | 0.930           | 0.910           | 0.260          | 0.260           | 0.260          | 0.260           | 0.910          |
| Diabetic retinopathy     | <0.001      | 0.292           | 0.105           | <0.001         | <0.001          | 0.292           | <0.001         | <0.001          | 0.191          | 0.272           | 0.626          |
| Coronary artery disease  | 0.133       | 0.280           | 0.280           | 0.310          | 0.280           | 0.560           | 0.280          | 0.340           | 0.280          | 0.280           | 0.640          |

P values by log-rank test for overall five subgroups or P values by multiple log-rank test for a pair of five subgroups.

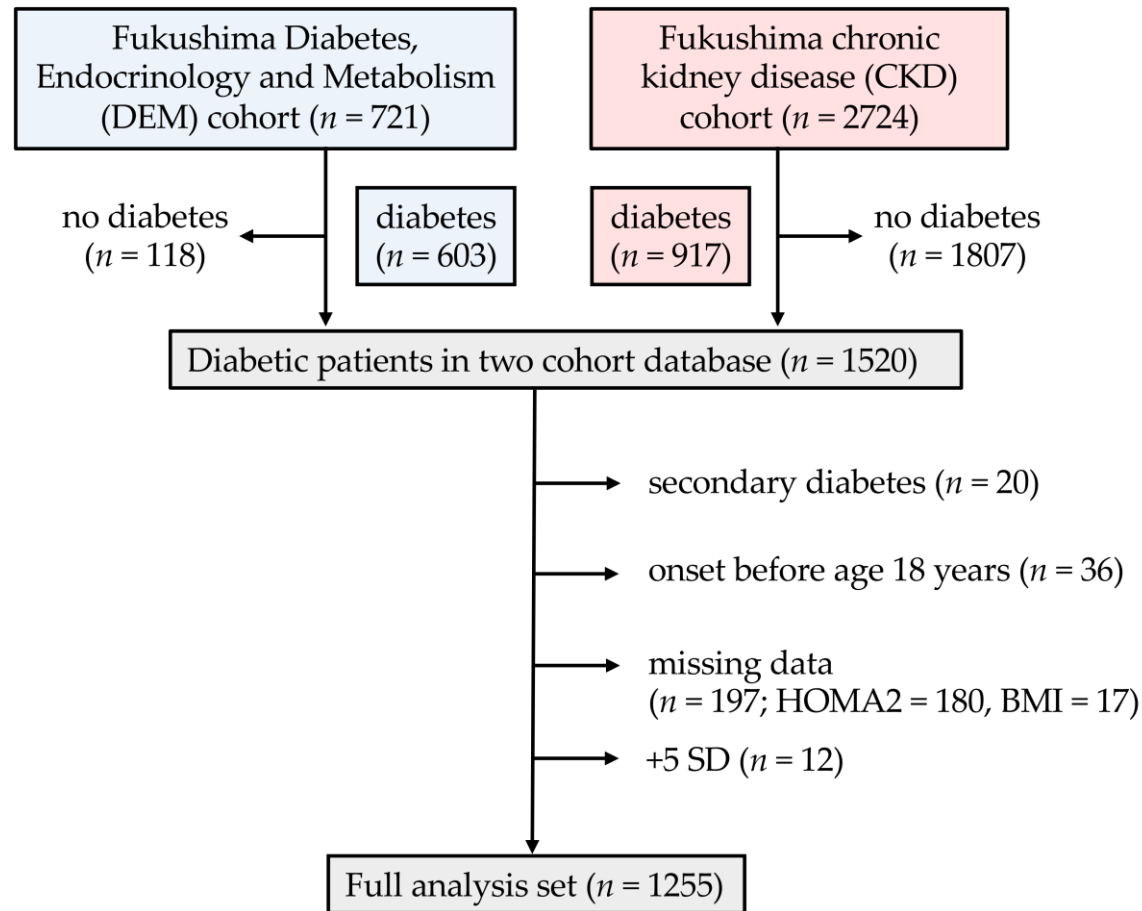

**Figure S1. Enrollment flow chart** Among the 3444 patients surveyed, 1520 were diagnosed as having diabetes. Patients with secondary diabetes, onset before age 18 years, missing data, and extreme outliers ( $> 5$  SDs from the mean) were excluded. CKD: chronic kidney disease; HOMA: homeostatic model assessment; BMI: body mass index; SD: standard deviation
